# Supplementary material for: N ε−Lysine Acetylation of a Bacterial Transcription Factor Inhibits Its DNA-Binding Activity
Source: PLoS One. 2010 Dec 31;5(12):e15123. doi: 10.1371/journal.pone.0015123 (PMC3013089; doi:10.1371/journal.pone.0015123)
Supplement: Table S3 — E. coli K-12 strains used in this studya. aStrains contain additional mutations associated with strain VH1000 = lacI lacZ pyrE +. The VH1000 = lacI lacZ pyrE + φ(flhD-lacZ) strain [5] was a gift from R. Gourse (University of Wisconsin-Madison). The strain is derived from E. coli K-12 MG1655. (DOC) [file pone.0015123.s006.doc]

**Table S3. *E. coli* K-12 strains used in this studya.**

|  | **Strains used for -galactosidase activity determination** |
| --- | --- |
| **Strain Number** | **Genotypea,b** |
| JE11822 | (*flhD-lacZ*) *araC536* *araBAD567* Δ*rcsB770*::*kan*+/pBAD30 |
| JE11823 | (*flhD-lacZ*) *araC536* *araBAD567* Δ*rcsB770*::*kan*+/pRCSB3 *rcsB+* |
| JE11824 | (*flhD-lacZ*) *araC536* *araBAD567* Δ*rcsB770*::*kan*+/pRCSB4 *rcsB1336* (RcsBK180A) |
| JE11825 | (*flhD-lacZ*) *araC536* *araBAD567* Δ*rcsB770*::*kan*+/pRCSB5 *rcsB1337* (RcsBK180R) |
| JE11826 | (*flhD-lacZ*) *araC536* *araBAD567* Δ*rcsB770*::*kan*+/pRCSB7 *rcsB1338* (RcsBK180Q) |
|  | **Strains used for swimming motility assays – investigation of Lys180 substitutions** |
| **Strain Number** | **Genotypeb** |
| JE12017 | *araC536* *araBAD567* Δ*rcsB770*::*kan*+/ pBAD30 |
| JE12018 | *araC536* *araBAD567* Δ*rcsB770*::*kan*+/ pRCSB3 *rcsB+* |
| JE12019 | *araC536* *araBAD567* Δ*rcsB770*::*kan*+/ pRCSB4 *rcsB1336* (RcsBK180A) |
| JE12020 | *araC536* *araBAD567* Δ*rcsB770*::*kan*+/ pRCSB5 *rcsB1337* (RcsBK180R) |
| JE12021 | *araC536* *araBAD567* Δ*rcsB770*::*kan*+/ pRCSB7 *rcsB1338* (RcsBK180Q) |
